# Supplementary material for: A calixpyridinium-based supramolecular tandem assay for alkaline phosphatase and its application to ATP hydrolysis reaction
Source: Royal Society of Chemistry journal article supplement (doi:10.1039/c5ob02381e), 2016-01-01
Supplement: c5ob02381e1.pdf [file c5ob02381e1.pdf]

## Supporting Information

for

# A Calixpyridinium-Based Supramolecular Tandem Assay for Alkaline Phosphatase and Its Application to ATP Hydrolysis Reaction

Kui Wang\*, Jian-Hua Cui, Si-Yang Xing\*, Hong-Xi Dou

*Tianjin Key Laboratory of Structure and Performance for Functional Molecules; Key Laboratory of Inorganic-Organic Hybrid Functional Materials Chemistry (Tianjin Normal University), Ministry of Education; College of Chemistry, Tianjin Normal University, Tianjin 300387 (P. R. China)*

**Table S1.** Chemical Shift Changes ( $\Delta\delta$ , ppm) of Calixpyridinium Protons in the Presence of ATP, ADP, and AMP at pD 7.2<sup>a,b</sup>

|     | H <sub>a</sub> | H <sub>b</sub> | H <sub>c</sub> | H <sub>d</sub> | H <sub>e</sub> |
|-----|----------------|----------------|----------------|----------------|----------------|
| ATP | 0.85           | -0.14          | -0.20          | -0.11          | 0.03           |
| ADP | 0.20           | -0.05          | -0.07          | -0.04          | -0.03          |
| AMP | 0.17           | -0.04          | -0.05          | -0.04          | -0.03          |

<sup>a</sup>  $\Delta\delta = \delta(\text{presence of 1 equiv of guest}) - \delta(\text{free host})$ . <sup>b</sup> The host and guest were mixed in a 1:1 stoichiometry at 5 mM.

**Table S2.** Chemical Shift Changes ( $\Delta\delta$ , ppm) of ATP, ADP, and AMP Protons in the Presence of Calixpyridinium at pD 7.2<sup>a,b</sup>

| guests | H <sub>1</sub> | H <sub>2</sub> | H <sub>3</sub> | H <sub>4</sub> | H <sub>5</sub> | H <sub>6</sub> | H <sub>7</sub> |
|--------|----------------|----------------|----------------|----------------|----------------|----------------|----------------|
| ATP    | -0.06          | -0.06          | -0.10          | -0.01          | -0.01          | 0.03           | 0.09           |
| ADP    | -0.04          | -0.02          | -0.07          | -0.01          | -0.03          | 0.01           | 0.05           |
| AMP    | -0.07          | -0.08          | -0.09          | -0.02          | -0.03          | 0.00           | 0.03           |

<sup>a</sup>  $\Delta\delta = \delta(\text{presence of 1 equiv of host}) - \delta(\text{free guest})$ . <sup>b</sup> The host and guest were mixed in a 1:1 stoichiometry at 5 mM.

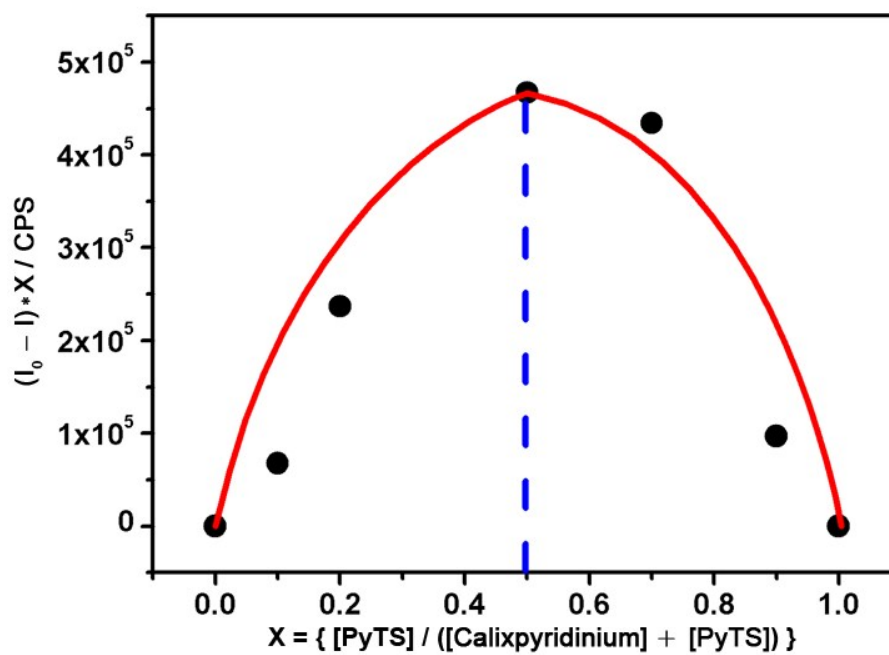

**Figure S1.** Job's plot for calixpyridinium and PyTS in 10 mM NaOAc solution at pH 7.2 ( $\lambda_{\text{exc}} = 339 \text{ nm}$ ,  $\lambda_{\text{obs}} = 385 \text{ nm}$ ),  $[\text{calixpyridinium}] + [\text{PyTS}] = 4 \mu\text{M}$ .

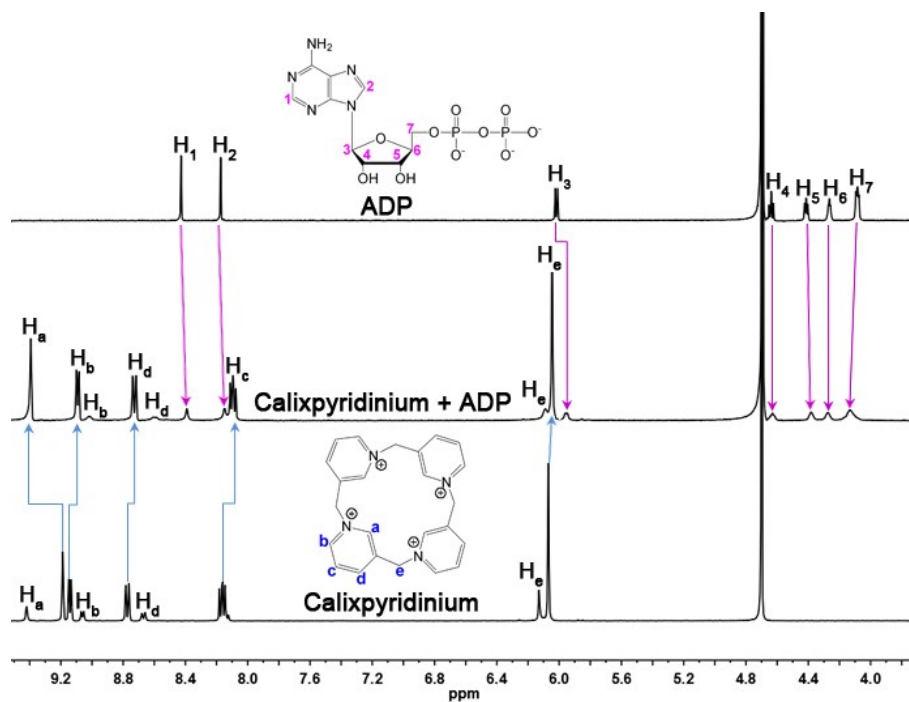

(a)

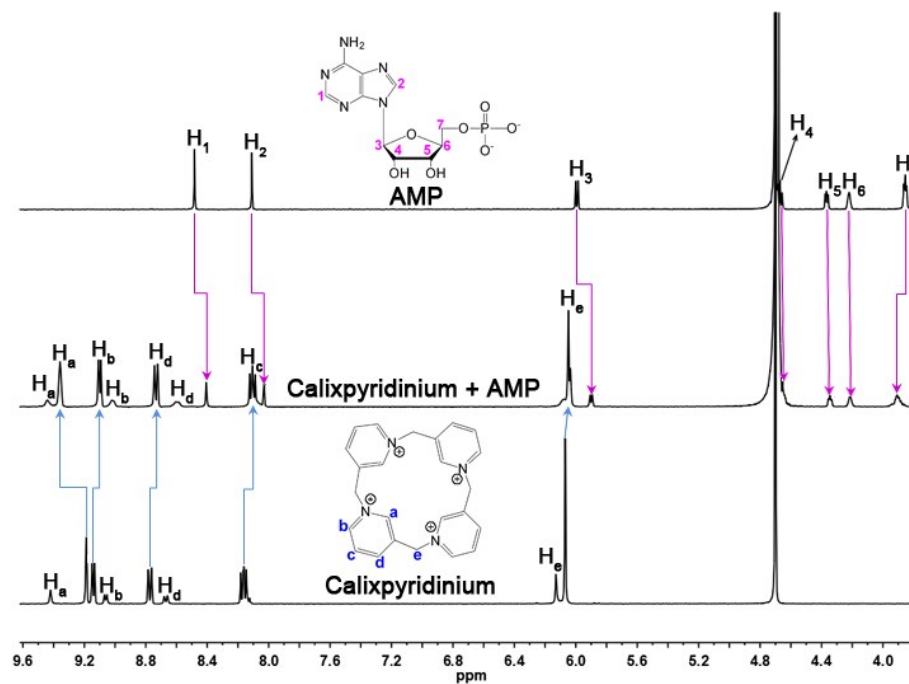

(b)

**Figure S2.** (a)  $^1\text{H}$  NMR spectra of ADP, calixpyridinium, and calixpyridinium+ADP complex at pH 7.2; (b)  $^1\text{H}$  NMR spectra of AMP, calixpyridinium, and calixpyridinium+AMP complex at pH 7.2. The host and guest were mixed in a 1:1 stoichiometry at 5 mM.

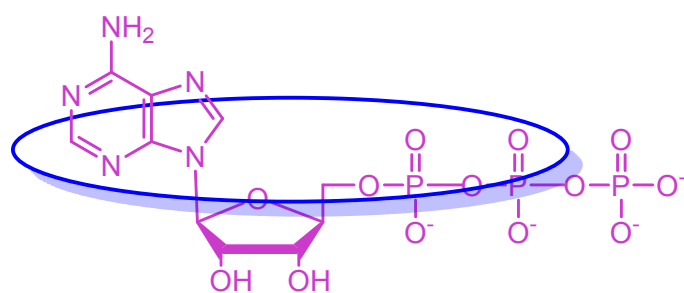

(a)

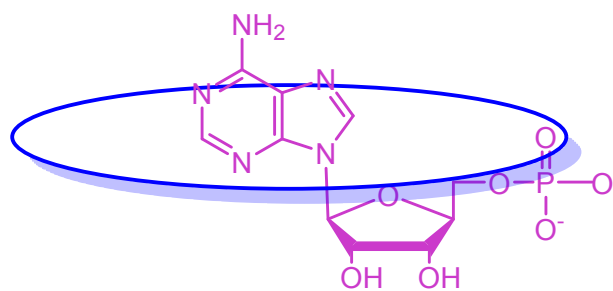

(b)

**Figure S3.** Deduced binding modes of calixpyridinium with ATP (a) and AMP (b) at pD 7.2 according to <sup>1</sup>H NMR spectra.

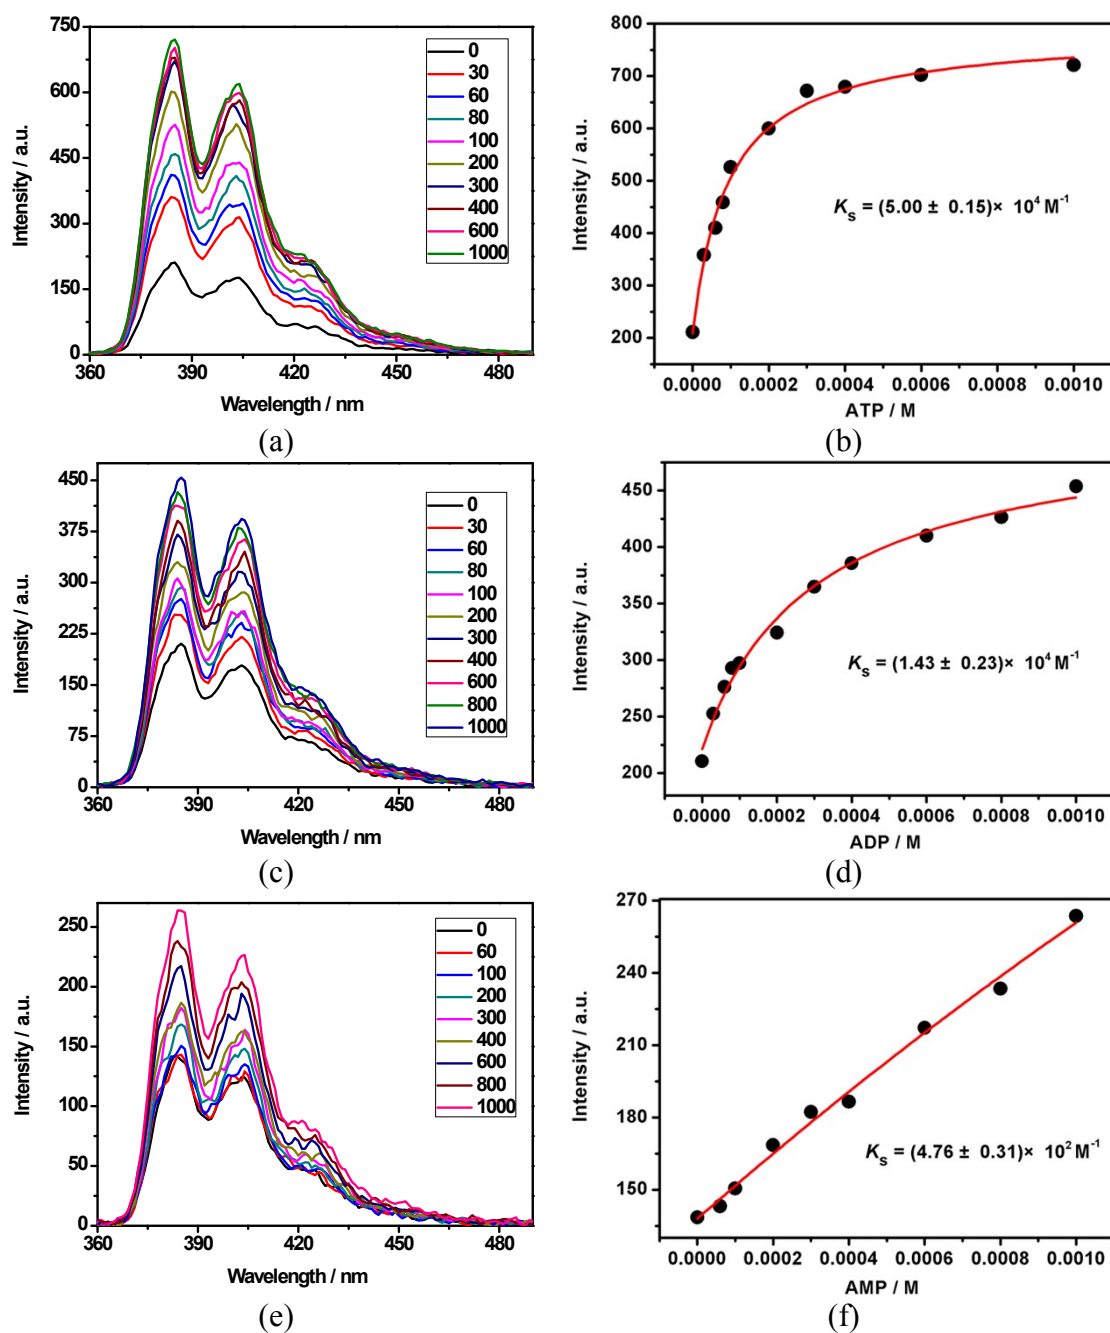

**Figure S4.** Competitive fluorescence titrations of ATP (a and b), ADP (c and d), and AMP (e and f) in the presence of PyTS (1.0  $\mu\text{M}$ ) and calixpyridinium (4.0  $\mu\text{M}$ ) in 10 mM NaOAc solution at pH 7.2 ( $\lambda_{\text{exc}} = 339 \text{ nm}$ ,  $\lambda_{\text{obs}} = 385 \text{ nm}$ ).

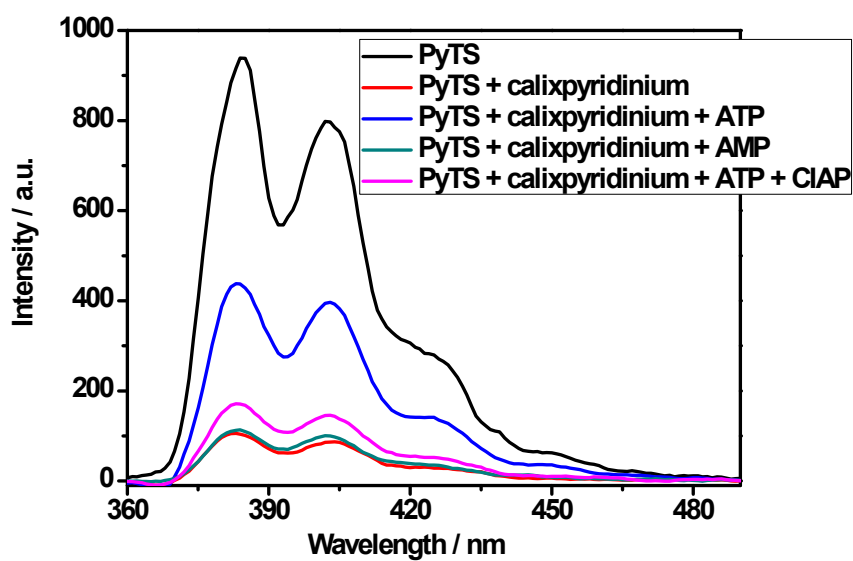

**Figure S5.** Fluorescence emission spectra of PyTS, PyTS+calixpyridinium, PyTS+calixpyridinium+ATP, PyTS+calixpyridinium+AMP, and PyTS+calixpyridinium+ATP+CIAP in 10 mM NaOAc solution at pH 7.2, excited at 339 nm. The concentrations of PyTS, calixpyridinium, ATP, AMP, and CIAP are 1.0  $\mu$ M, 4.0  $\mu$ M, 60  $\mu$ M, 60  $\mu$ M, and 1.5 U/mL, respectively.

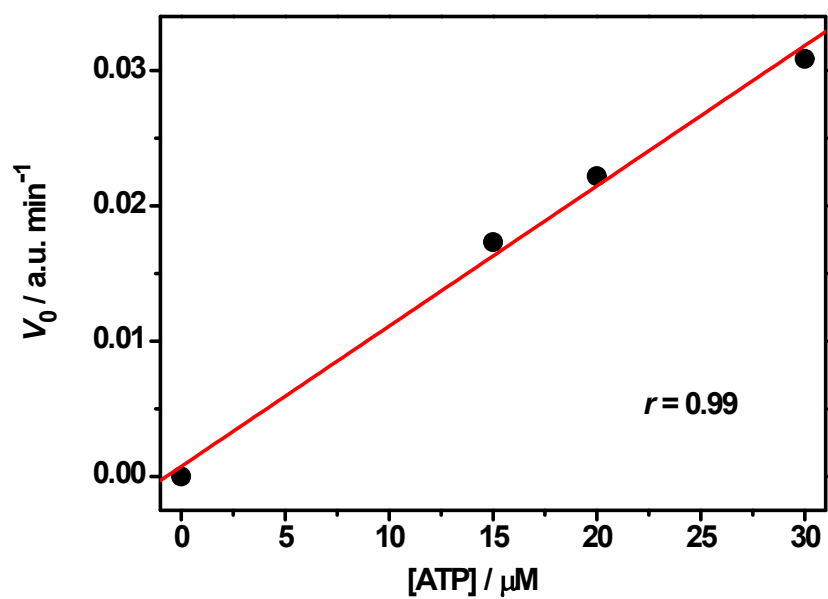

**Figure S6.** Linear relationship between the initial reaction rates and the concentrations of ATP (0–30 μM with 1.5 U/mL CIAP, 1.0 μM PyTS, and 4.0 μM calixpyridinium) in 10 mM NaOAc solution at pH 7.2 ( $\lambda_{\text{exc}} = 339$  nm,  $\lambda_{\text{obs}} = 385$  nm).



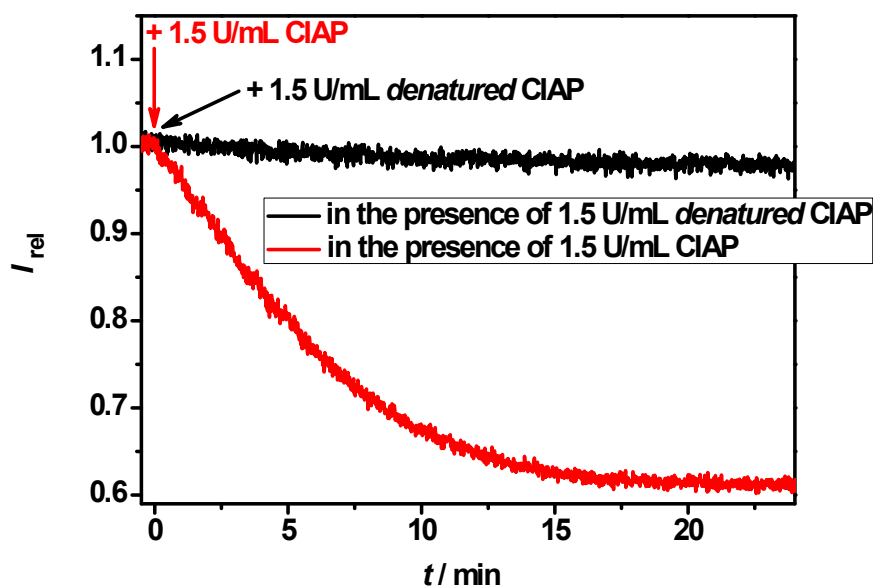

**Figure S7.** Continuous fluorescent enzyme assays for CIAP and *denatured* CIAP (1.5 U/mL) with the calixpyridinium/PyTS reporter pair (60  $\mu$ M ATP, 1.0  $\mu$ M PyTS, and 4.0  $\mu$ M calixpyridinium in 10 mM NaOAc solution at pH 7.2;  $\lambda_{\text{exc}} = 339$  nm,  $\lambda_{\text{obs}} = 385$  nm).

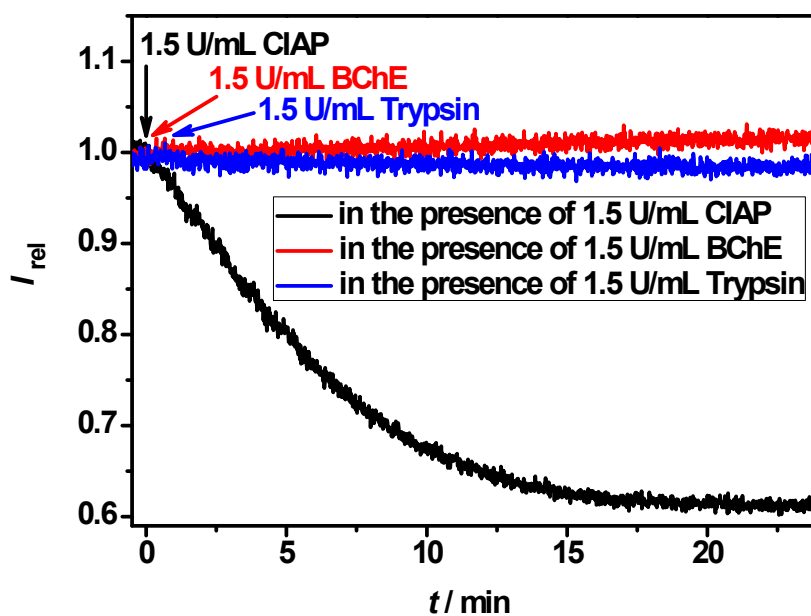

**Figure S8.** Continuous fluorescent enzyme assays for CIAP, BChE, and Trypsin (1.5 U/mL) with the calixpyridinium/PyTS reporter pair (60  $\mu$ M ATP, 1.0  $\mu$ M PyTS, and 4.0  $\mu$ M calixpyridinium in 10 mM NaOAc solution at pH 7.2;  $\lambda_{\text{exc}} = 339$  nm,  $\lambda_{\text{obs}} = 385$  nm).

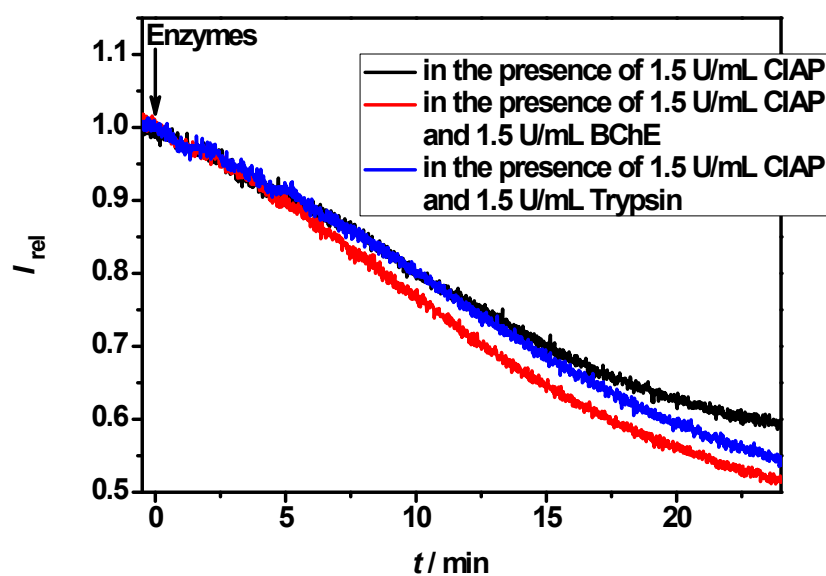

**Figure S9.** Continuous fluorescent enzyme assays for CIAP (1.5 U/mL) in the absence and presence of BChE (1.5 U/mL) or Trypsin (1.5 U/mL) with the calixpyridinium/PyTS reporter pair (60  $\mu$ M ATP, 1.0  $\mu$ M PyTS, and 4.0  $\mu$ M calixpyridinium in 10 mM NaOAc solution at pH 7.2;  $\lambda_{exc} = 339$  nm,  $\lambda_{obs} = 385$  nm).
